# Supplementary material
Source: PubMed Central journal article supplement (PMC9742163)
Supplement: NIHMS1819121-supplement-7.pdf [file NIHMS1819121-supplement-7.pdf]

ImmunoCAP ISAC Assay

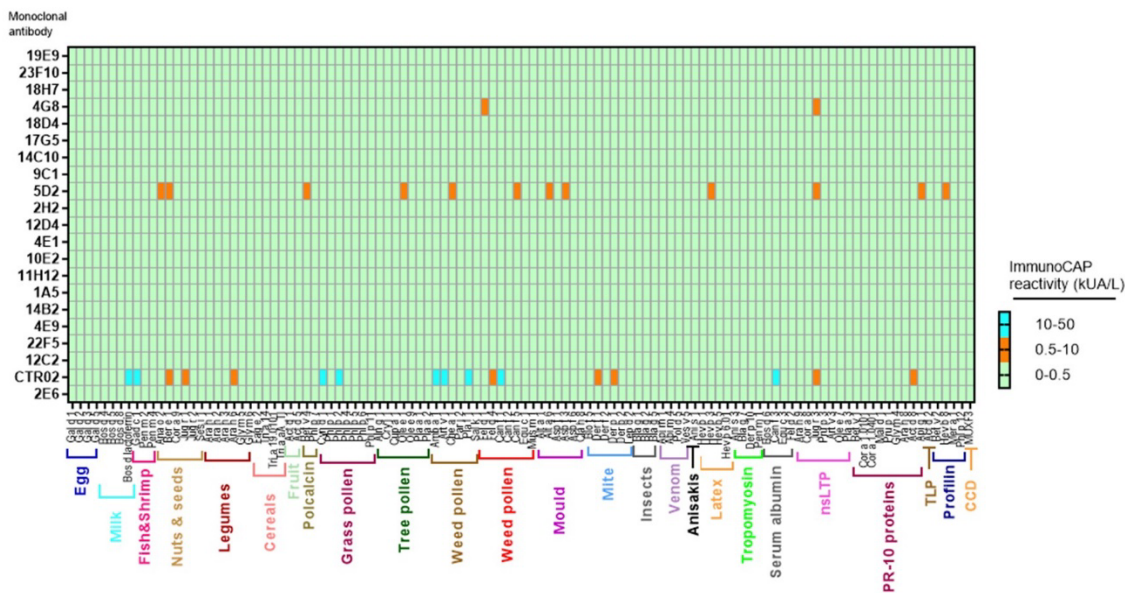

**Supplemental Data Figure 2. Cross-reactivity analysis of IgE mAbs from patients with LF against common allergens.** Heatmap of IgE binding to an ISAC allergen array. MABs were used at an estimated concentration of 1-10 $\mu$ g/mL against 112 common allergens. CTR02 is a positive control included in the immunoCAP ISAC assay.
