# Supplementary material
Source: PubMed Central journal article supplement (PMC9742163)
Supplement: NIHMS1819121-supplement-8.pdf [file NIHMS1819121-supplement-8.pdf]

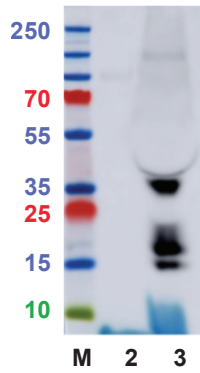

**Supplemental Data Figure 3. Immunoblot analysis of a *D. immitis* protein somatic extract and *B. malayi* culture using mAb 2E6.** Lane 1 shows the molecular weight marker. Lane 2 is run with *D. immitis* somatic whole worm extract. Lane 3 contains concentrated culture media in which *B. malayi* adult male and female worms were kept for 7 days, containing only excreted proteins.
