# Supplementary material
Source: PubMed Central journal article supplement (PMC9742163)
Supplement: NIHMS1819121-supplement-9.pdf [file NIHMS1819121-supplement-9.pdf]

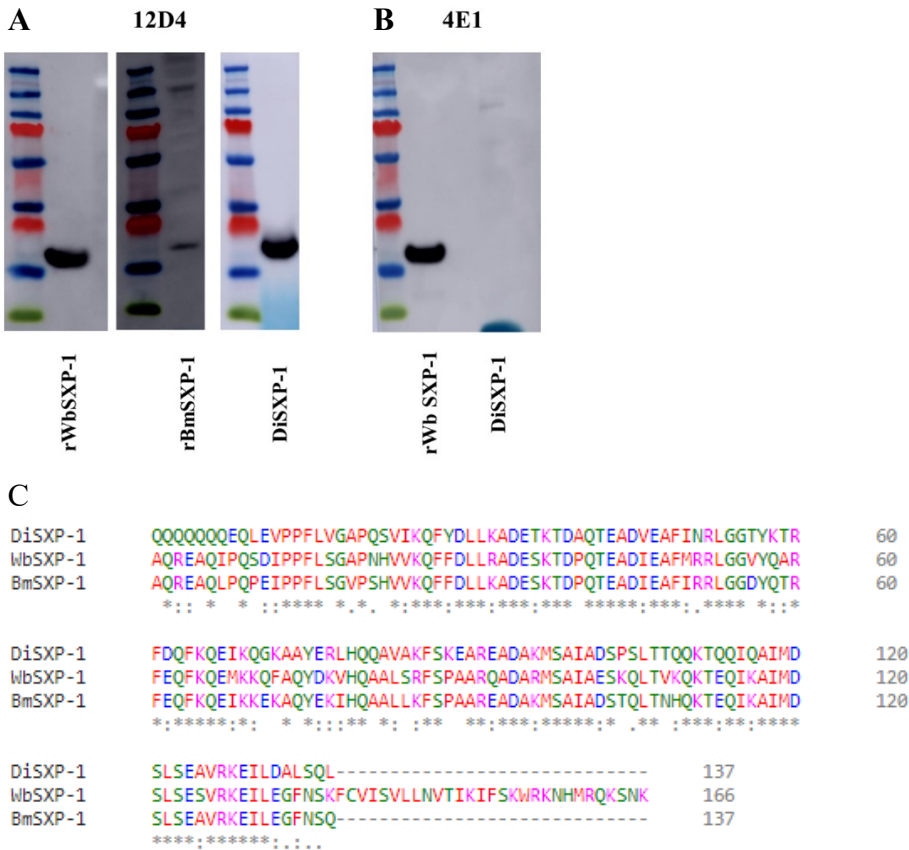

**Supplemental Data Figure 4. Extent of 12D4 and 4E1 cross-reactivity against SXP-1 proteins from *W. bancrofti*, *B. malayi* and *D. immitis*.** **A**, Immunoblot analysis of mAb 12D4 against recombinant WbSXP-1 and BmSXP-1 as well as a *D. immitis* protein somatic extract containing DiSXP-1. **B**, Immunoblot analysis of mAb 4E1 against recombinant WbSXP-1 and DiSXP-1. **C**, Amino acid sequence alignment of WbSXP-1 with homologous proteins in *B. malayi* (AAA27864.1) and *D. immitis* (JR903413.1). Amino acid conservation across aligned proteins is indicated as follows: “\*” identical; “:” strongly similar; “.” weakly similar.
