# Supplementary material
Source: PubMed Central journal article supplement (PMC9742163)
Supplement: NIHMS1819121-supplement-10.pdf [file NIHMS1819121-supplement-10.pdf]

A.

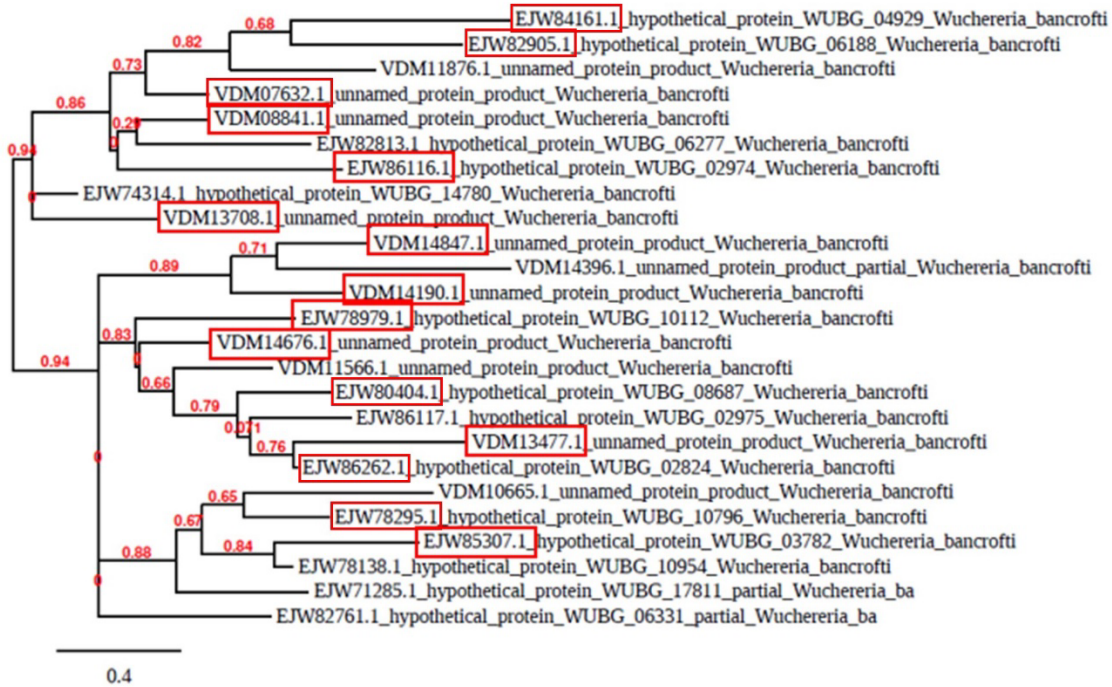

B.

|                     | EJW84161.1<br>(TTR_83) | EJW82905.1<br>(TTR_85) | VDM07632.1<br>(TTR_32) | VDM08841.1<br>(TTR_43) | EJW82813.1<br>(TTR_16) | VDM13708.1<br>(TTR_88) | VDM14847.1<br>(TTR_47) | VDM14190.1<br>(TTR_90) | EJW78979.1<br>(TTR_79) | VDM14676.1<br>(TTR_76) | EJW80404.1<br>(TTR_84) | VDM13477.1<br>(TTR_77) | EJW86117.1<br>(TTR_80) | EJW86262.1<br>(TTR_86) | EJW85307.1<br>(TTR_87) | VDM1566.1 | EJW86111.1 | VDM10665.1 | EJW78138.1 | EJW71285.1 | EJW82761.1 |      |
|---------------------|------------------------|------------------------|------------------------|------------------------|------------------------|------------------------|------------------------|------------------------|------------------------|------------------------|------------------------|------------------------|------------------------|------------------------|------------------------|-----------|------------|------------|------------|------------|------------|------|
| EJW84161.1 (TTR_83) | 30.5                   |                        |                        |                        |                        |                        |                        |                        |                        |                        |                        |                        |                        |                        |                        |           |            |            |            |            |            |      |
| EJW82905.1 (TTR_85) | 32.2                   | 27.4                   |                        |                        |                        |                        |                        |                        |                        |                        |                        |                        |                        |                        |                        |           |            |            |            |            |            |      |
| VDM07632.1 (TTR_32) | 25.4                   | 35.1                   | 33.1                   |                        |                        |                        |                        |                        |                        |                        |                        |                        |                        |                        |                        |           |            |            |            |            |            |      |
| VDM08841.1 (TTR_43) | 28.1                   | 26.9                   | 23.9                   | 36.9                   |                        |                        |                        |                        |                        |                        |                        |                        |                        |                        |                        |           |            |            |            |            |            |      |
| VDM13708.1 (TTR_88) | 27.9                   | 43.2                   | 27.7                   | 60.7                   | 33.6                   |                        |                        |                        |                        |                        |                        |                        |                        |                        |                        |           |            |            |            |            |            |      |
| VDM14847.1 (TTR_47) | 24.1                   | 19.3                   | 24.6                   | 29.4                   | 23.1                   | 30.6                   |                        |                        |                        |                        |                        |                        |                        |                        |                        |           |            |            |            |            |            |      |
| VDM14190.1 (TTR_90) | 28.2                   | 33.3                   | 30.7                   | 38.2                   | 31.9                   | 30.7                   | 31.0                   |                        |                        |                        |                        |                        |                        |                        |                        |           |            |            |            |            |            |      |
| EJW78979.1 (TTR_79) | 23.8                   | 28.1                   | 29.5                   | 40.3                   | 33.8                   | 41.5                   | 36.6                   | 39.7                   |                        |                        |                        |                        |                        |                        |                        |           |            |            |            |            |            |      |
| VDM14676.1 (TTR_76) | 30.0                   | 29.6                   | 31.9                   | 54.5                   | 35.7                   | 44.6                   | 31.2                   | 46.4                   | 49.6                   |                        |                        |                        |                        |                        |                        |           |            |            |            |            |            |      |
| EJW80404.1 (TTR_84) | 31.6                   | 30.3                   | 23.7                   | 43.0                   | 33.8                   | 45.4                   | 28.7                   | 34.5                   | 52.1                   | 48.7                   |                        |                        |                        |                        |                        |           |            |            |            |            |            |      |
| VDM13477.1 (TTR_77) | 24.6                   | 25.8                   | 28.6                   | 43.0                   | 39.1                   | 40.7                   | 34.0                   | 34.6                   | 63.0                   | 50.0                   | 55.9                   |                        |                        |                        |                        |           |            |            |            |            |            |      |
| EJW86117.1 (TTR_80) | 25.0                   | 25.6                   | 26.1                   | 39.1                   | 39.4                   | 43.1                   | 40.0                   | 43.1                   | 60.9                   | 47.5                   | 58.5                   | 70.1                   |                        |                        |                        |           |            |            |            |            |            |      |
| EJW86262.1 (TTR_86) | 30.9                   | 28.8                   | 23.0                   | 29.9                   | 36.8                   | 27.6                   | 29.5                   | 31.0                   | 40.6                   | 30.3                   | 35.5                   | 29.1                   | 30.3                   |                        |                        |           |            |            |            |            |            |      |
| EJW85307.1 (TTR_87) | 25.4                   | 34.3                   | 24.0                   | 30.3                   | 29.9                   | 29.5                   | 29.7                   | 25.7                   | 35.1                   | 29.9                   | 35.1                   | 29.2                   | 30.8                   | 47.4                   |                        |           |            |            |            |            |            |      |
| VDM1566.1           | 26.6                   | 29.7                   | 23.6                   | 27.5                   | 28.7                   | 26.1                   | 24.4                   | 27.6                   | 28.2                   | 27.2                   | 21.8                   | 29.1                   | 32.1                   | 27.6                   | 22.3                   |           |            |            |            |            |            |      |
| EJW86111.1          | 27.3                   | 26.0                   | 29.1                   | 44.4                   | 39.4                   | 48.8                   | 31.7                   | 37.0                   | 50.9                   | 46.6                   | 45.2                   | 53.2                   | 46.6                   | 30.8                   | 32.1                   | 30.2      |            |            |            |            |            |      |
| EJW78138.1          | 28.8                   | 43.2                   | 28.4                   | 66.3                   | 39.0                   | 69.1                   | 30.4                   | 48.7                   | 49.3                   | 43.4                   | 44.8                   | 32.1                   | 37.3                   | 24.7                   | 47.4                   |           |            |            |            |            |            |      |
| EJW71285.1          | 31.9                   | 24.0                   | 21.8                   | 29.6                   | 33.8                   | 35.5                   | 23.5                   | 28.4                   | 47.5                   | 32.9                   | 43.2                   | 41.5                   | 46.3                   | 46.7                   | 25.7                   | 34.8      | 35.9       | 26.4       |            |            |            |      |
| EJW82761.1          | 23.0                   | 18.1                   | 25.6                   | 37.1                   | 40.2                   | 36.9                   | 33.4                   | 34.1                   | 47.4                   | 44.9                   | 40.3                   | 46.0                   | 49.6                   | 34.9                   | 31.0                   | 28.3      | 41.1       | 36.1       | 36.7       |            |            |      |
| VDM10665.1          | 26.2                   | 23.5                   | 26.4                   | 45.1                   | 35.8                   | 37.4                   | 28.0                   | 37.9                   | 45.4                   | 41.0                   | 52.0                   | 52.1                   | 51.8                   | 36.2                   | 35.2                   | 22.9      | 43.0       | 48.0       | 40.7       | 42.6       |            |      |
| VDM10665.1          | 25.2                   | 20.2                   | 24.8                   | 26.0                   | 26.6                   | 27.3                   | 24.7                   | 29.2                   | 33.9                   | 30.7                   | 37.8                   | 32.1                   | 36.1                   | 43.5                   | 40.7                   | 26.8      | 28.9       | 27.9       | 27.3       | 29.3       | 31.0       |      |
| EJW78138.1          | 32.2                   | 27.4                   | 30.6                   | 32.4                   | 30.9                   | 30.3                   | 28.7                   | 26.3                   | 34.4                   | 33.7                   | 33.7                   | 33.0                   | 33.3                   | 45.9                   | 54.9                   | 27.7      | 34.6       | 31.6       | 24.5       | 29.9       | 33.1       | 41.6 |
| EJW71285.1          | 30.2                   | 27.5                   | 28.1                   | 35.9                   | 29.0                   | 31.1                   | 25.9                   | 26.5                   | 36.8                   | 35.9                   | 37.1                   | 33.7                   | 35.0                   | 40.0                   | 40.4                   | 29.4      | 29.0       | 31.2       | 25.5       | 34.0       | 30.5       | 38.1 |
| EJW82761.1          | 25.0                   | 27.4                   | 26.7                   | 29.3                   | 26.0                   | 31.9                   | 29.9                   | 43.2                   | 28.9                   | 33.0                   | 25.0                   | 25.8                   | 35.2                   | 34.3                   | 35.3                   | 33.3      | 25.4       | 31.0       | 29.3       | 26.7       | 30.7       | 29.9 |

**Supplemental Data Figure 5. Phylogenetic tree of *W. bancrofti* TTR proteins. A,** All sequences reported for WbTTR proteins were collected from NCBI, and a maximum-likelihood phylogenetic tree of TTR proteins was assembled using the MUSCLE algorithm, with omission of partial and repetitive sequences reported in NCBI. Proteins chosen for recombinant expression are boxed in red. **B,** Pairwise percent identity of *W. bancrofti* TTR proteins.
