# Supplementary material
Source: PubMed Central journal article supplement (PMC9742163)
Supplement: NIHMS1819121-supplement-11.pdf [file NIHMS1819121-supplement-11.pdf]

1A5

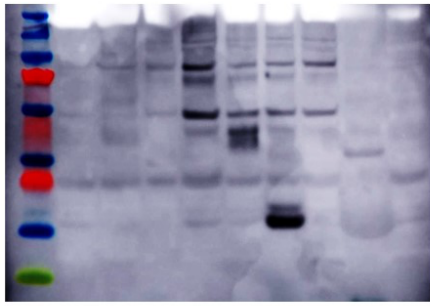

TTR\_08  
TTR\_07  
TTR\_76  
TTR\_16  
TTR\_90  
TTR\_77  
TTR\_47  
TTR\_79  
TTR\_41

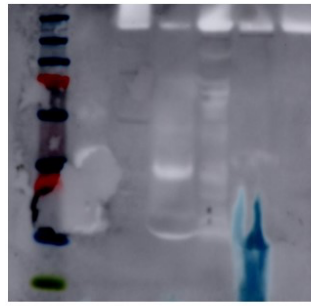

TTR\_04  
TTR\_05  
TTR\_32  
TTR\_61  
TTR\_62  
TTR\_95

5H1

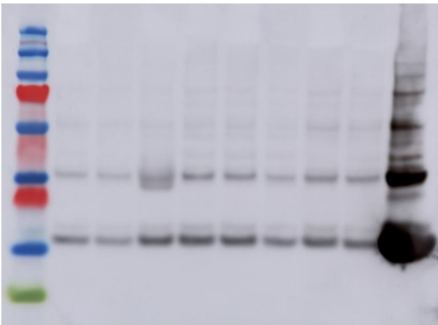

TTR\_08  
TTR\_07  
TTR\_76  
TTR\_16  
TTR\_90  
TTR\_77  
TTR\_47  
TTR\_41  
TTR\_79

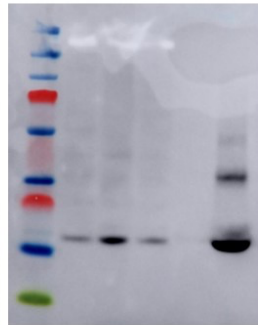

TTR\_05  
TTR\_61  
TTR\_95  
TTR\_62  
TTR\_32

9C1

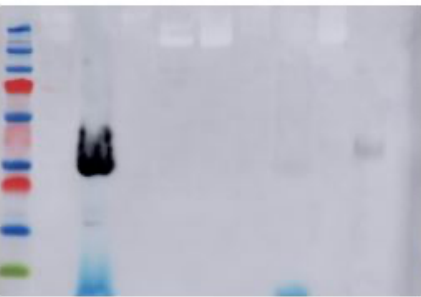

TTR\_07  
TTR\_76  
TTR\_16  
TTR\_90  
TTR\_77  
TTR\_47  
TTR\_79  
TTR\_41  
TTR\_08

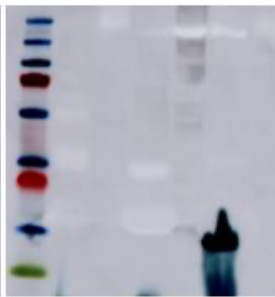

TTR\_04  
TTR\_05  
TTR\_32  
TTR\_61  
TTR\_62  
TTR\_95

14B2

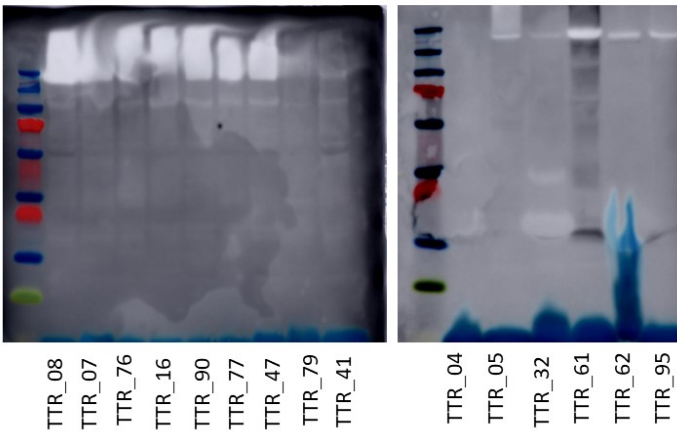

18H7

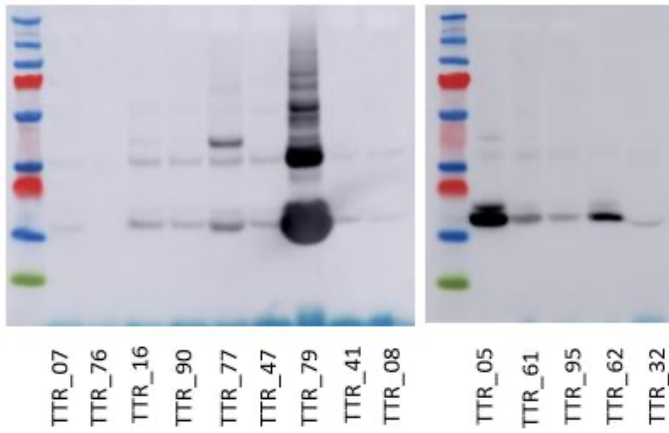

**Supplemental Data Figure 6. Cross-reactivity of TTR-specific IgE mAbs against different TTR proteins.** Fifteen WbTTR proteins were expressed in Shuffle T7 *E. coli* and used for immunoblot analysis. Protein expression was verified by immunoblot using an anti-His polyclonal antibody prior to cross-reactivity analysis.
