# Supplementary material
Source: PubMed Central journal article supplement (PMC9742163)
Supplement: NIHMS1819121-supplement-14.pdf [file NIHMS1819121-supplement-14.pdf]

| IgE MAb | Light | Heavy chain                               |                   |                     |                   |            |                         |             | Light chain                             |                   |                       |                   |                  |             |
|---------|-------|-------------------------------------------|-------------------|---------------------|-------------------|------------|-------------------------|-------------|-----------------------------------------|-------------------|-----------------------|-------------------|------------------|-------------|
|         |       | V gene                                    | V gene % identity | J gene              | J gene % identity | D gene     | Junction                | HCDR length | V gene                                  | V gene % identity | J gene                | J gene % identity | Junction         | LCDR length |
| 4E1     | κ     | V1-46*01 F, or V1-46*03 F                 | 96.18             | J4*02 F             | 93.75             | D3-22*01 F | CATLYYYDDSGYTYDYW       | 8.8.15      | V3-20*01 F                              | 92.2              | J1*01 F               | 100               | CQQYGNSPWTF      | 7.3.9       |
| 12D4    | λ     | V1-45*02 F                                | 97.57             | J4*02 F             | 93.75             | D3-22*01 F | CAVAYHYDSSGYPFDHW       | 8.8.15      | V1-40*01 F                              | 96.18             | J2*01 F, or J3*01 F   | 94.74             | CQSYDSSLGPPVVF   | 9.3.12      |
| 5H1     | κ     | V3-30*03 F, or V3-30*18 F or V3-30-5*01 F | 90.28             | J4*02 F             | 85.11             | D3-16*01 F | CAKDGPIYAYRWGGFLDDW     | 8.8.16      | V3-15*01 F                              | 92.47             | J4*01 F               | 100               | CQQYHSWPPLTF     | 6.3.10      |
| 9C1     | κ     | V3-23*01 F, or V3-23D*01 F                | 92.01             | J6*02 F             | 79.03             | D6-19*01 F | CAKQKRECSGWCKWGGLD VW   | 8.8.18      | V2-28*01 F, or V2D-28*01 F              | 97.62             | J2*01 F               | 97.3              | CMQALQTPYTF      | 11.3.9      |
| 14C10   | λ     | V3-21*01 F                                | 93.06             | J3*02 F             | 96                | D4-17*01 F | CARDTYGDTDDAFDIW        | 8.8.14      | V3-25*03 F                              | 89.25             | J3*02 F               | 89.47             | CHVVDRITETYSVVF  | 6.3.12      |
| 7G12    | κ     | V1-18*01 F                                | 89.24             | J4*02 F             | 82.98             | D5-12*01 F | CARGRDSPDHW             | 8.8.9       | V1-5*03 F                               | 92.83             | J2*01 F               | 86.84             | CQQYDHPHTF       | 6.3.9       |
| 1A5     | λ     | V3-30*03 F, or V3-30*18 F or V3-30-5*01 F | 96.88             | J4*02 F             | 56                | D3-22*01 F | CAKAMDSSGYYCPIYD        | 8.8.15      | V3-19*01 F                              | 97.13             | J1*01 F               | 100               | CNSRDSSGNHLVVF   | 6.3.12      |
| 10H9    | λ     | V3-11*06 F                                | 89.93             | J1*01 F             | 66.67             | D2-8*02 F  | CAKDYCGSGACYTADPGFF HQW | 8.8.20      | V3-21*01 F                              | 93.91             | J1*01 F               | 94.74             | CQVVDNTNDHPSY VF | 6.3.13      |
| 11G1    | λ     | V5-51*03 F                                | 88.89             | J6*02 F, or J6*04 F | 58.14             | ND         | CAREVYVASTDSYGMVDV      | 8.8.18      | V2-23*01 F, or V2-23*02 F or V2-23*03 F | 88.19             | J1*01 F               | 86.11             | CCSYAGGNTYVF     | 9.3.10      |
| 14B2    | κ     | V3-53*02 F                                | 87.37             | J4*02 F             | 74.07             | D5-24*01 F | CVRHGDGWNVYDSW          | 8.7.12      | V3-15*01 F                              | 94.62             | J4*01 F               | 71.05             | CQQYNNWPLTF      | 6.3.9       |
| 10D5    | κ     | V3-21*01 F                                | 90.97             | J6*03 F             | 83.87             | D3-22*01 F | CARVMVGLYYYMDIW         | 8.8.15      | V3-20*01 F                              | 94.68             | J1*01 F               | 97.37             | CQLYGTSPWTF      | 7.3.10      |
| 18D4    | κ     | V4-34*02 F, or V4-34*08 F                 | 91.23             | J4*02 F             | 77.08             | D1-1*01 F  | CGRGRGYTWNW             | 8.7.10      | V1-39*01 F, or V1D-39*01 F              | 93.55             | J2*01 F, or J2*02 (F) | 88.57             | CQQSYSGPPTF      | 6.3.9       |
| 30A10   | κ     | V3-21*01 F                                | 97.92             | J6*03 F             | 87.1              | D6-13*01 F | CARDGPPIVAAGLIYYMG VW   | 8.8.20      | V1-9*01 F                               | 98.57             | J2*02 (F)             | 97.22             | CQHLNSYRTF       | 6.3.8       |
| 4E9     | λ     | V4-34*02 F                                | 92.28             | J6*02 F             | 93.55             | D6-13*01 F | CASSGESSRRGYFYMGMD VW   | 8.7.19      | V1-47*01 F, or V1-47*02 F               | 92.6              | J3*02 F               | 89.47             | CAAWDDLILGPRVF   | 8.3.12      |
| 2E6     | λ     | V1-69*01 F                                | 91.32             | J4*02 F             | 100               | D5-18*01 F | CASYPYGKYFDYW           | 8.8.12      | V1-51*01 F                              | 94.39             | J3*02 F               | 97.14             | CGAWDLGLNAGVF    | 8.3.11      |
| 11H12   | λ     | V3-11*01 F                                | 89.24             | J4*02 F             | 85.11             | ND         | CARDWGTTLVTFDLW         | 8.8.13      | V4-60*03 F                              | 86.74             | J3*02 F               | 75.68             | CFTWDSDSRVF      | 7.7.9       |

### Supplemental Data Figure 9. Sequence features of filaria-reactive human IgE mAbs.

Antibody germline gene segment usages and their percent identity are shown for variable (V), diverse (D), and joining (J) regions of both light and heavy chains based on the ImMunoGeneTics (IMGT) database. The number of amino acids that make up the CDRs (HCDR & LCDR length) and the amino acids making up the junction is shown.
